# Supplementary material
Source: PubMed Central journal article supplement (PMC5437241)
Supplement: 10.1074_M116.773283_jbc.M116.773283-1.pdf [file 10.1074_M116.773283_jbc.M116.773283-1.pdf]

## **Modifiers of prion protein biogenesis and recycling identified by a highly-parallel endocytosis kinetics assay**

Boris A. Ballmer<sup>1</sup>, Rita Moos<sup>1</sup>, Prisca Liberali<sup>2,3</sup>, Lucas Pelkmans<sup>3</sup>, Simone Hornemann<sup>1</sup>,  
Adriano Aguzzi<sup>1</sup>

Institute of Neuropathology, University of Zurich, Zurich, Switzerland<sup>1</sup>,  
Institute of Molecular Life Sciences, University of Zurich, Zurich, Switzerland<sup>2</sup>,  
Friedrich Miescher Institute for Biomedical Research, Basel, Switzerland<sup>3</sup>

### Supporting Information

#### Table of Contents

- S-0 Overview
  
- S-1 Figure S1 Cell line selection for the FRET assays by sandwich ELISA
  
- S-2 Figure S2A Selection of best POM antibody pair for the detection of cell surface PrP<sup>C</sup> by FRET in A549 cells  
Figure S2B Titration of POM2-Eu and POM2-APC in HeLa cells
  
- S-3 Figure S3A Optimization of the alamarBlue cell viability assay  
Figure S3B Measurement of cell death induced by Staurosporine treatment  
Figure S3C Effect of PI-PLC treatment on cell viability of A549 cells
  
- S-4 Figure S4 Viability of siRNA-treated A549 cells
  
- S-5 Figure S5 Functionality test of used siRNAs by qPCR in A549 cells
  
- S-6 Figure S6A PrP<sup>C</sup> endocytosis assay in HeLa cells  
Figure S6B Antibody test in endocytosis assay

## Ballmer et al., Figure S1

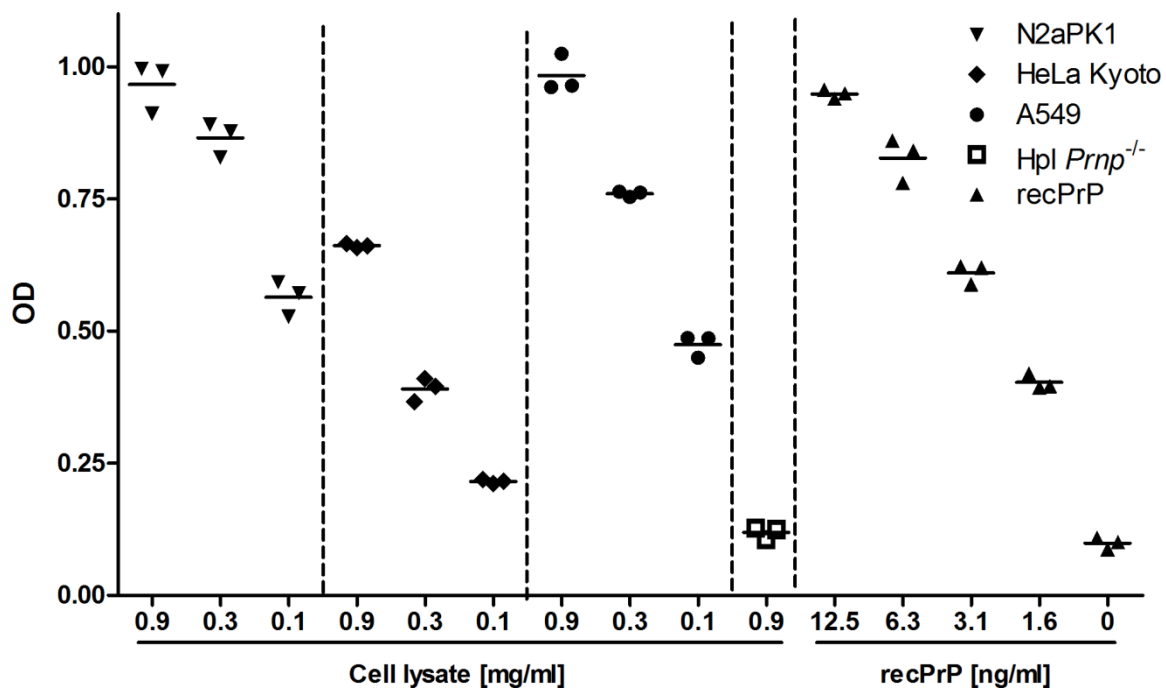

Figure S1. Cell line selection for the FRET assays by sandwich ELISA.

PrP<sup>C</sup> levels from crude cell lysates were detected by POM2/POM2bio ELISA. Plates were coated with POM2 antibody and detected with biotinylated (bio) POM2.

## Ballmer et al., Figure S2

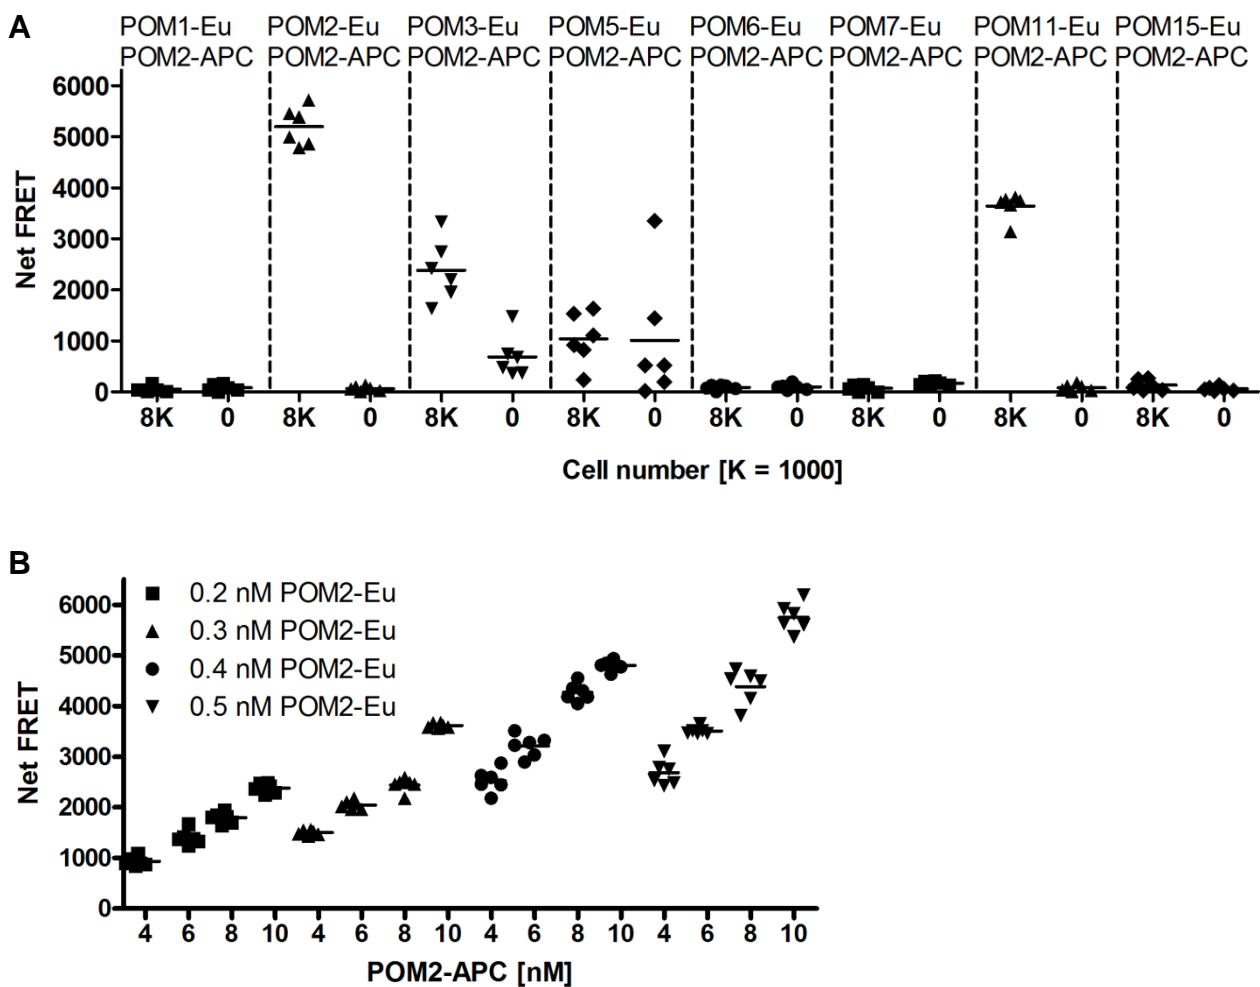Figure S2. Selection of best POM antibody pair for the detection of cell surface PrP<sup>C</sup> by FRET.

(A) Different FRET antibody combinations were tested for the detection of PrP<sup>C</sup> on the surface of living A549 cells. APC-coupled POM2 antibody (POM2-APC) was used as FRET acceptor for all experiments. Various antibodies (POM1, 2, 3, 5, 6, 7, 11, 15, 3F4) were coupled to Eu and tested.

(B) Titration of the POM2-Eu and POM2-APC FRET antibody pair in HeLa cells (K = 8000). Shown are results from hexaplicates  $\pm$  SD.

## Ballmer et al., Figure S3

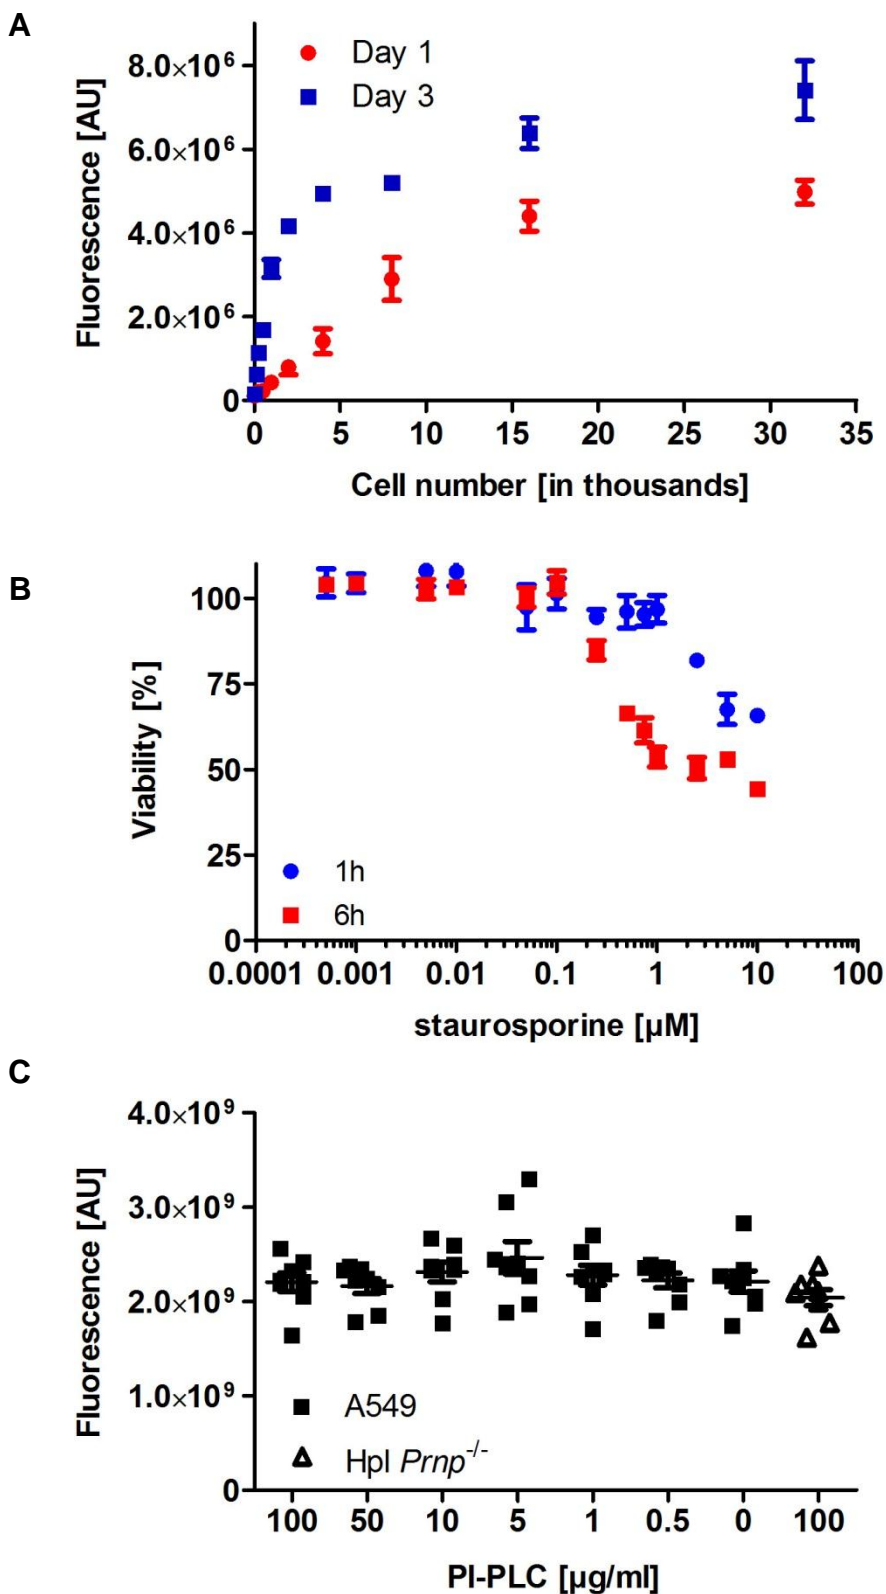

Figure S3. Optimization of the alamarBlue cell viability assay.

(A) Viability of HeLa cells was monitored over three days in a titration experiment, day one (red) and day three (blue). AU: Arbitrary Units. (B) Measurement of cell death induced by Staurosporine treatment for one or six hours. AU: Arbitrary Units. (C) Effect of PI-PLC treatment on cell viability of A549 cells. AU: Arbitrary Units.

## Ballmer et al., Figure S4

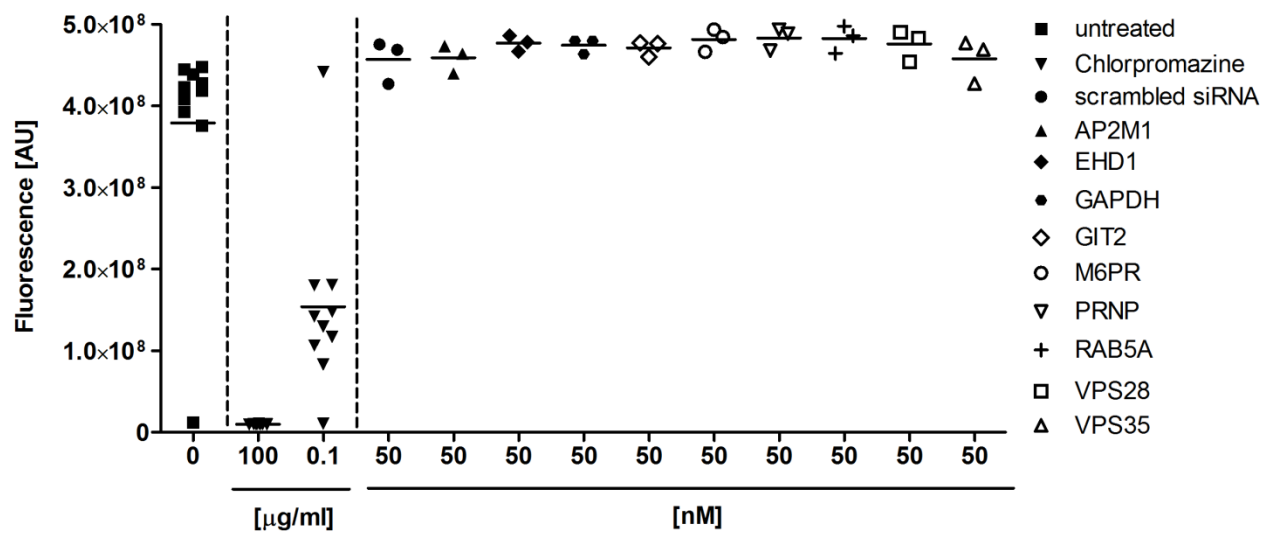

Figure S4. Viability of siRNA-treated A549 cells.

A549 cells were treated for three days with 50 nM siRNA. Cell viability was assessed by the alamarBlue assay. Chlorpromazine (CPZ) was used as a positive control for cell death. Shown are biological triplicates of siRNA treated cells.

## Ballmer et al., Figure S5

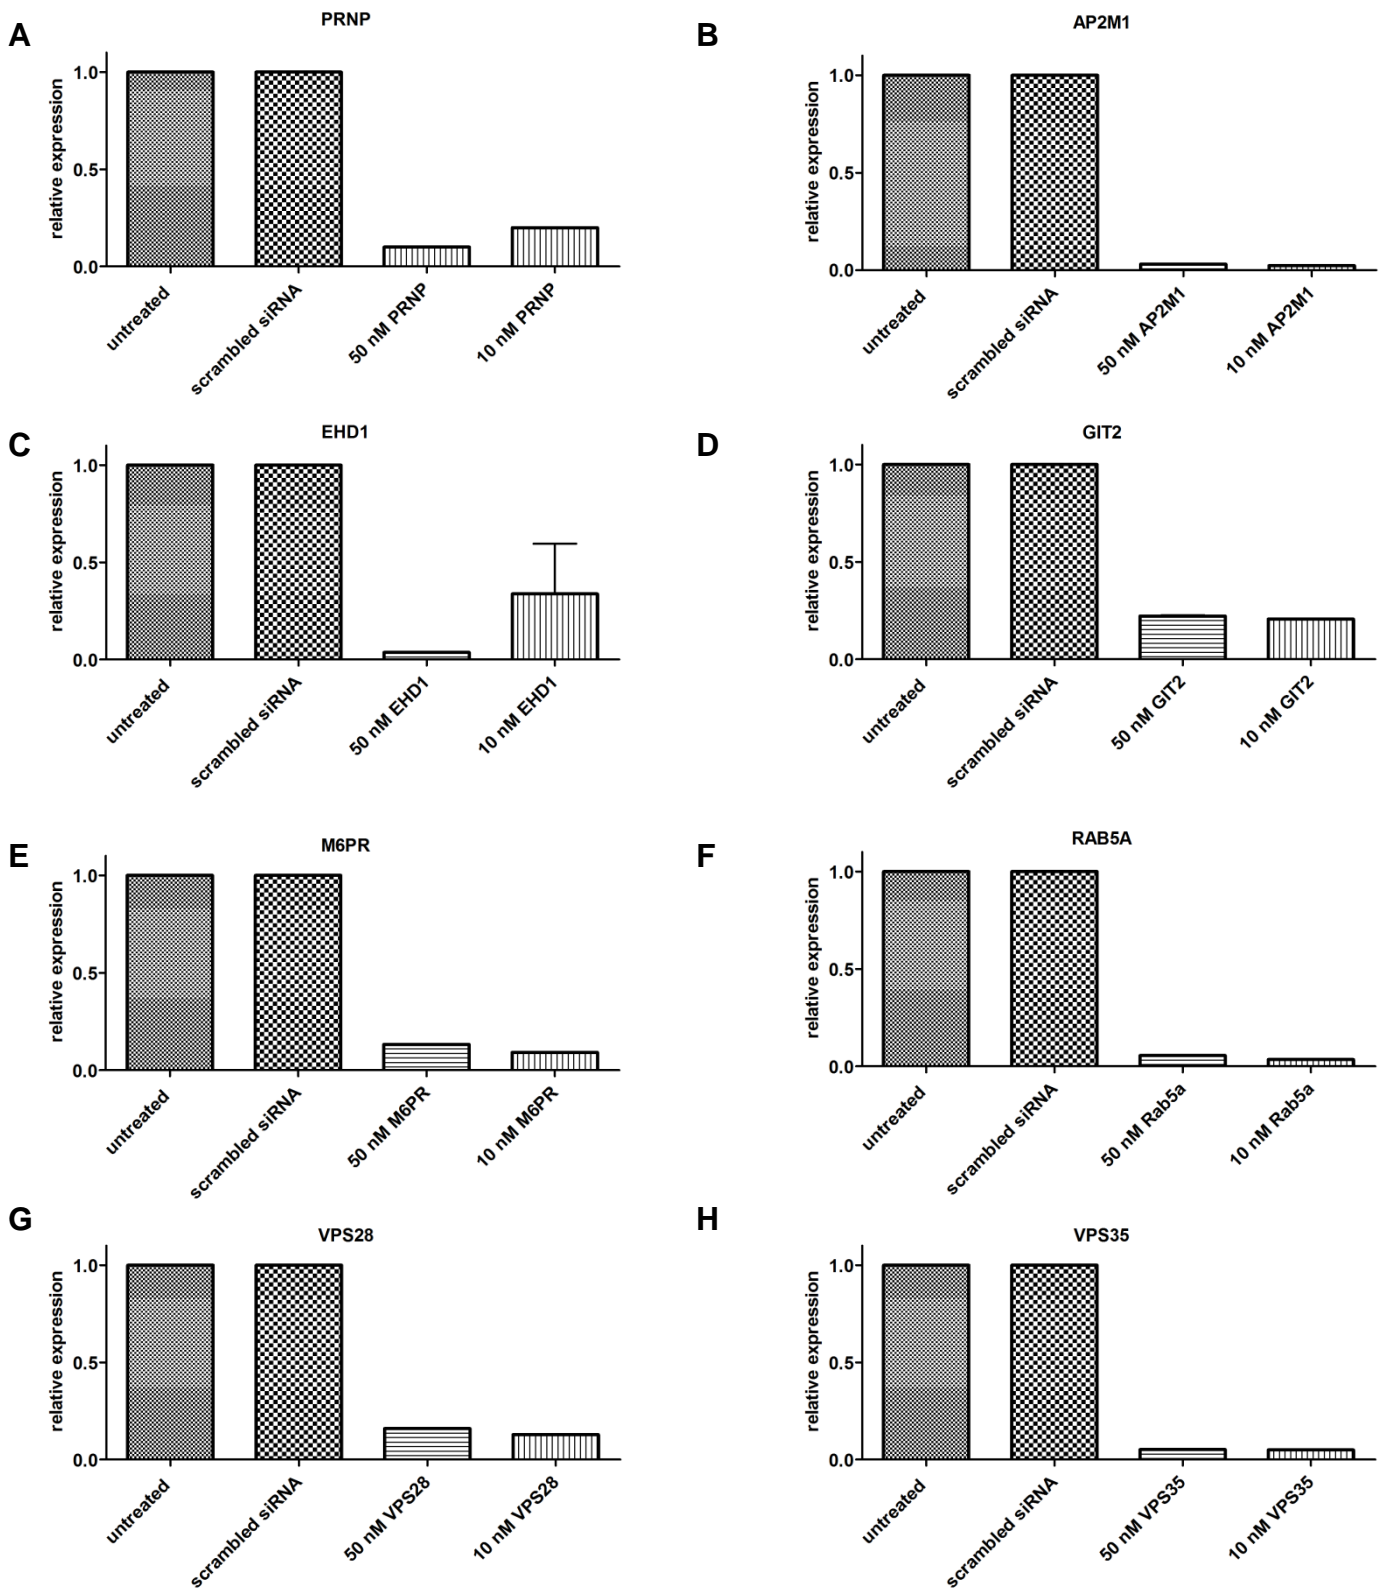

Figure S5. Functionality test of used siRNAs by qPCR in A549 cells.

The gene-silencing activity in A549 cells treated for three days with different siRNAs was quantified by real-time PCR. mRNA levels were normalized by using GAPDH mRNA. Shown are technical triplicates  $\pm$  standard deviation.

## Ballmer et al., Figure S6

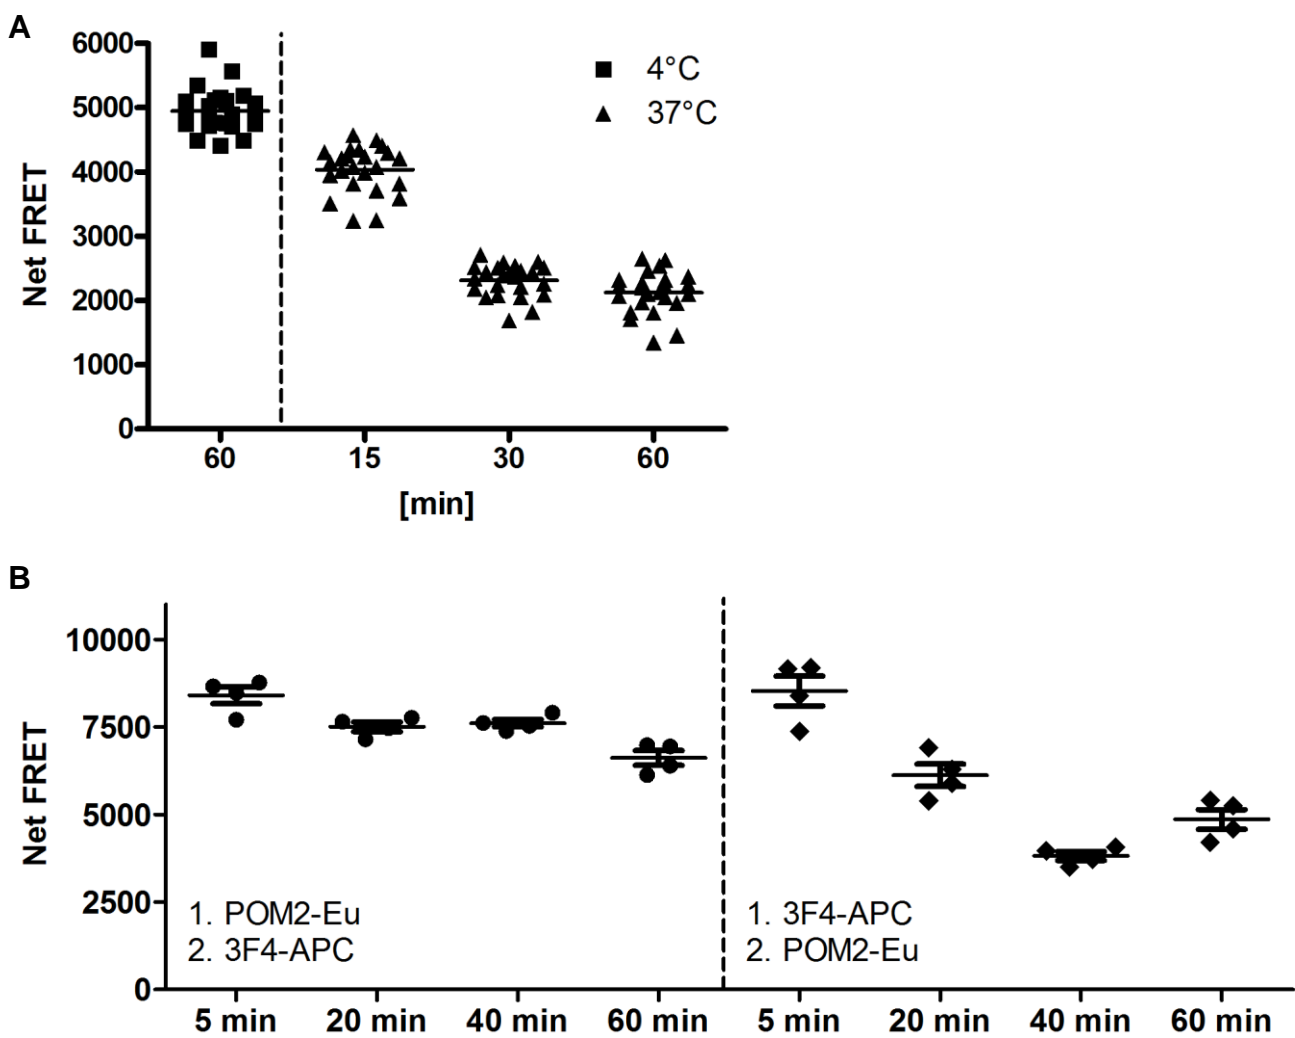Figure S6. Optimization of PrP<sup>C</sup> endocytosis assay

(A) PrP<sup>C</sup> endocytosis assay in HeLa cells. Endocytosis rate was measured at 15, 30, and after 60 minutes. In controls, endocytosis assay was performed at 4°C. (B) PrP<sup>C</sup> endocytosis assay in A549 cells. Endocytosis rate was measured at different time points. Cells were either labeled first with POM2-Eu and then with 3F4-APC or first with 3F4-APC and then with POM2-Eu.
